# Supplementary material for: Plasma Ceramide Concentrations in Full-Term Pregnancies Complicated with Gestational Diabetes Mellitus: A Case-Control Study
Source: MDPI journal article supplement (doi:10.3390/metabo12111123), 2022-11-16
Supplement: s1 [file s1]

**Table S1.** Correlation among ceramide concentrations and studied parameters for the GDM group.

|                                 | <b>Cer16:0</b> | <b>Cer18:0</b> | <b>Cer24:0</b> | <b>Cer24:1</b> |
|---------------------------------|----------------|----------------|----------------|----------------|
| <b>Maternal parameters</b>      |                |                |                |                |
| Age (years)                     | −0.066         | 0.097          | 0.038          | 0.147          |
| Weight (kg)                     | −0.088         | 0.001          | 0.110          | −0.124         |
| Term BMI (kg/m <sup>2</sup> )   | 0.130          | 0.180          | 0.540          | 0.498          |
| Smoking                         | 0.003          | 0.079          | 0.023          | 0.163          |
| Medications                     | −0.100         | −0.003         | −0.005         | 0.081          |
| <b>Delivery parameters</b>      |                |                |                |                |
| Gestational age (weeks)         | −0.046         | −0.116         | −0.025         | −0.099         |
| Delivery mode                   | 0.148          | −0.003         | 0.107          | 0.207          |
| Delivery indication             | 0.158          | 0.173          | −0.052         | −0.097         |
| <b>Neonatal parameters</b>      |                |                |                |                |
| Birthweight (g)                 | −0.002         | −0.066         | −0.008         | −0.150         |
| Apgar score at 1 min            | 0.037          | −0.061         | −0.156         | −0.004         |
| Apgar score at 5 min            | 0.110          | −0.077         | 0.153          | 0.067          |
| <b>Blood pressure</b>           |                |                |                |                |
| SBP (mm Hg)                     | 0.163          | 0.121          | 0.041          | 0.035          |
| DBP (mm Hg)                     | 0.204          | 0.265          | 0.157          | 0.298          |
| <b>Biochemistry</b>             |                |                |                |                |
| Creatinine (mg/dL)              | 0.159          | 0.099          | 0.059          | 0.057          |
| Urea (mg/dL)                    | −0.187         | −0.115         | −0.011         | −0.009         |
| SGOT (IU/L)                     | 0.613          | 0.524          | 0.331          | 0.177          |
| SGPT (IU/L)                     | 0.679          | 0.651          | 0.394          | 0.224          |
| Uric acid (mg/dL)               | 0.150          | 0.038          | 0.289          | −0.050         |
| Platelets (10 <sup>3</sup> /mL) | 0.073          | 0.072          | −0.154         | 0.064          |

Data are given as Spearman correlation coefficient ( $\rho$ ). BMI: body mass index; DBP: diastolic blood pressure; GDM: gestational diabetes mellitus; SBP: systolic blood pressure; SGPT: glutamate–pyruvate transaminase.

**Table S2.** Correlation among ceramide concentrations and studied parameters for the control group.

|                                 | <b>Cer16:0</b> | <b>Cer18:0</b> | <b>Cer24:0</b> | <b>Cer24:1</b> |
|---------------------------------|----------------|----------------|----------------|----------------|
| <b>Maternal parameters</b>      |                |                |                |                |
| Age (years)                     | 0.139          | 0.040          | 0.196          | 0.068          |
| Weight (kg)                     | 0.011          | −0.026         | −0.013         | −0.118         |
| Term BMI (kg/m <sup>2</sup> )   | 0.073          | 0.015          | 0.088          | −0.048         |
| Smoking                         | −0.114         | −0.007         | 0.042          | −0.018         |
| Medications                     | -              | -              | -              | -              |
| <b>Delivery parameters</b>      |                |                |                |                |
| Gestational age (weeks)         | 0.071          | −0.040         | 0.180          | 0.016          |
| Delivery mode                   | −0.032         | 0.023          | −0.113         | 0.062          |
| Delivery indication             | −0.124         | 0.005          | −0.301         | −0.173         |
| <b>Neonatal parameters</b>      |                |                |                |                |
| Birthweight (g)                 | 0.046          | −0.059         | 0.161          | −0.042         |
| Apgar score at 1 min            | −0.345         | −0.393         | 0.011          | −0.037         |
| Apgar score at 5 min            | −0.448         | −0.484         | 0.008          | −0.034         |
| <b>Blood pressure</b>           |                |                |                |                |
| SBP (mm Hg)                     | 0.055          | 0.021          | −0.024         | 0.149          |
| DBP (mm Hg)                     | 0.061          | 0.010          | 0.062          | −0.085         |
| <b>Biochemistry</b>             |                |                |                |                |
| Creatinine (mg/dL)              | 0.013          | 0.002          | −0.148         | 0.105          |
| Urea (mg/dL)                    | 0.049          | 0.082          | −0.249         | 0.010          |
| SGOT (IU/L)                     | 0.091          | 0.352          | −0.203         | 0.007          |
| SGPT (IU/L)                     | 0.100          | 0.336          | −0.194         | −0.052         |
| Uric acid (mg/dL)               | 0.202          | 0.214          | −0.217         | 0.136          |
| Platelets (10 <sup>3</sup> /mL) | 0.017          | 0.073          | 0.172          | −0.056         |

Data are given as Spearman correlation coefficient ( $\rho$ ). BMI: body mass index; DBP: diastolic blood pressure; SBP: systolic blood pressure; SGPT: glutamate–pyruvate transaminase.
